1 **Comprehensive ecosystem-specific 16S rRNA gene databases with**  
2 **automated taxonomy assignment (AutoTax) provide species-level**  
3 **resolution in microbial ecology**

4

5 **Authors:** Morten Simonsen Dueholm, Kasper Skytte Andersen, Francesca Petriglieri,  
6 Simon Jon McIlroy, Marta Nierychlo, Jette Fisher Petersen, Jannie Munk Kristensen, Erika  
7 Yashiro, Søren Michael Karst, Mads Albertsen, and Per Halkjær Nielsen\*

8

9 **Affiliation:**

10 Center for Microbial Communities, Department of Chemistry and Bioscience, Aalborg  
11 University, Aalborg, Denmark.

12

13 \*Correspondence to: Per Halkjær Nielsen, Center for Microbial Communities, Department  
14 of Chemistry and Bioscience, Aalborg University, Fredrik Bajers Vej 7H, 9220 Aalborg,  
15 Denmark; Phone: +45 9940 8503; Fax: Not available; E-mail: phn@bio.aau.dk

16

17

18

19

20

21

22 **Running title:**

23 Comprehensive ecosystem-specific 16S rRNA gene databases with automated taxonomy  
24 assignment

25

26

27 **Abstract:** High-throughput 16S rRNA gene amplicon sequencing is an indispensable  
28 method for studying the diversity and dynamics of microbial communities. However, this  
29 method is presently hampered by the lack of high-identity reference sequences for many  
30 environmental microbes in the public 16S rRNA gene reference databases, and by the lack  
31 of a systematic and comprehensive taxonomic classification for most environmental  
32 bacteria. Here we combine high-quality and high-throughput full-length 16S rRNA gene  
33 sequencing with a novel sequence identity-based approach for automated taxonomy  
34 assignment (AutoTax) to create robust, near-complete 16S rRNA gene databases for  
35 complex environmental ecosystems. To demonstrate the benefit of the approach, we  
36 created an ecosystem-specific database for wastewater treatment systems and anaerobic  
37 digesters. The novel approach allows consistent species-level classification of 16S rRNA  
38 amplicons sequence variants and the design of highly specific oligonucleotide probes for  
39 fluorescence *in situ* hybridization, which can reveal *in situ* properties of microbes at  
40 unprecedented taxonomic resolution.

## 41 **Introduction**

42 Microbial communities determine the functions of microbial ecosystems in nature and  
43 engineered systems. A deep understanding of the communities requires reliable  
44 identification of the microbes present, as well as linking their identity with functions.  
45 Identification at the lowest taxonomic rank is preferred, as microbial traits vary in their  
46 degree of phylogenetic conservation, and many ecologically important traits are conserved  
47 only at the family to species rank<sup>1</sup>.

48  
49 Identification of microbes is commonly achieved by high throughput 16S rRNA gene  
50 amplicon sequencing, where a segment of the 16S rRNA gene spanning one to three  
51 hypervariable regions is amplified by PCR and sequenced. The amplicons are then  
52 clustered, based on sequence identity into operational taxonomic units (OTUs) or used to  
53 infer exact amplicon sequence variants (ASVs), also commonly known as sub-OTUs  
54 (sOTUs) or zero-radius OTUs (zOTUs), with denoising algorithms such as Deblur<sup>2</sup>,  
55 DADA2<sup>3</sup>, and Unoise3<sup>4</sup>. The sequences are finally classified, based on a 16S rRNA gene  
56 reference database to assign the most plausible taxonomy for each sequence<sup>5</sup>. ASVs are  
57 often preferred over OTUs, because they provide the highest phylogenetic resolution,  
58 supporting sub-genus to sub-species level classification, depending on the 16S rRNA gene  
59 region amplified and the taxon analyzed<sup>6</sup>.

60  
61 ASVs can be applied as consistent labels for microbial identification independently of a  
62 16S rRNA gene reference database<sup>6</sup>. This approach is used in several large-scale projects,  
63 including the Earth Microbiome Project (EMP)<sup>7</sup> and the American Gut project<sup>8</sup>, to provide  
64 detailed insight into the factors that shape the overall microbial community diversity and  
65 dynamics. However, ASVs are not ideal as references for linking microbial identity with  
66 functions. Firstly, ASVs do not contain enough evolutionary information to confidently  
67 resolve their phylogeny<sup>9,10</sup>, which makes it impossible to report and infer how microbial  
68 traits are conserved at different phylogenetic scales. Secondly, comparison of ASVs is only  
69 possible when they are produced and processed in the same way. This means that, without  
70 taxonomic assignment, it is not possible to compare results across studies that have used  
71 primer sets targeting different regions of the 16S rRNA gene. It also hampers our ability to  
72 exploit the power of new or improved sequencing technologies that can produce longer  
73 reads of high quality. Finally, if information about functional properties is available from  
74 pure cultures studies or *in situ* based on metagenome assembled genomes (MAGs), this  
75 information may be linked to full-length 16S rRNA sequences, but less reliably to  
76 ASVs<sup>9,10</sup>. Taxonomic assignment is therefore crucial for cross-study comparisons and the  
77 dissemination of microbial knowledge.

78  
79 Taxonomic assignment to ASVs relies on the classifier (e.g., syntax or RDP classifier) that  
80 applies different algorithms to compare each individual ASV to a 16S rRNA gene reference

81 database and proposes the best estimate for the taxonomy. Confident classification at the  
82 lowest taxonomic ranks requires high-identity reference sequences (~100% identity) and a  
83 comprehensive taxonomy for all references<sup>10</sup>. None of these criteria are met with the  
84 commonly applied universal reference databases (Greengenes<sup>11</sup>, SILVA<sup>12</sup>, and RDP<sup>13</sup>),  
85 which lack sequences for many environmental taxa and a comprehensive taxonomy for  
86 most uncultivated taxa.

87  
88 A solution to the aforementioned problems is to create ecosystem-specific reference  
89 databases. Some well-studied medium-complexity ecosystems, such as the human gut or  
90 oral microbiomes, now have fairly comprehensive reference databases with genus- to  
91 species-level resolution, which were obtained from thousands of isolates and MAGs<sup>14-16</sup>.  
92 However, this is not yet the case for most environmental ecosystems.

93  
94 New methods for high throughput full-length 16S rRNA gene sequencing, e.g., synthetic  
95 long-read sequencing on the Illumina platform<sup>17,18</sup>, but also emerging methods such as  
96 PacBio<sup>19</sup> and Nanopore<sup>20</sup> consensus sequencing, now allow generation of millions of high-  
97 quality reference sequences from any environmental ecosystem. This can provide high-  
98 identity references for many of the uncultured taxa which are currently missing in the large  
99 universal reference databases, but does not solve the problem of missing or poor taxonomic  
100 assignment for many taxa.

101  
102 Current strategies for generating and maintaining ecosystem-specific taxonomies involve  
103 ecosystem-specific curated versions of universal reference databases, where the taxonomy  
104 is manually curated for some process-critical microbes, and placeholder names are  
105 provided for the most abundant uncultured genera. Examples are the MiDAS database for  
106 microbes in biological wastewater treatment systems<sup>21</sup> and smaller ecosystem-specific  
107 databases that only include sequences from the specific ecosystem, with the taxonomy  
108 rigorously curated by scientists within the field such as the freshwater-specific FreshTrain  
109 database<sup>22</sup>, the human intestinal 16S rRNA gene taxonomic database<sup>14</sup>, and the human oral  
110 microbiome database<sup>16</sup>. However, manual ecosystem-specific curation of the reference  
111 databases is subjective and hardly sustainable with the fast growing number of sequences  
112 in such databases<sup>23</sup>.

113  
114 Ideally, we want an automated taxonomy assignment which can provide robust, objective  
115 taxonomic classifications for all ESVs, based on the most recent microbial taxonomy with  
116 introduction of placeholder names for taxa which have not yet received official names. To  
117 achieve this, we introduce AutoTax - a simple and efficient strategy to create a  
118 comprehensive ecosystem-specific taxonomy covering all taxonomic ranks. AutoTax uses  
119 the SILVA taxonomy as a backbone and provides robust placeholder names for  
120 unclassified taxa, based on *de novo* clustering of sequences according to statistically

121 supported identity thresholds for each taxonomic rank<sup>9</sup>. Due to the strict computational  
122 nature of the taxonomy assignment, we obtain an objective taxonomy, which can easily be  
123 updated, based on the most recent taxonomy in other reference databases.

124

125 We demonstrate the potential of the method by sequencing almost a million full-length  
126 small subunit rRNA gene (fSSU) sequences from Danish bioenergy and biological  
127 wastewater treatment systems and use these after error correction to create a new  
128 comprehensive ecosystem-specific reference database with 21,039 exact sequence variants  
129 (ESVs), which were classified using AutoTax. The value of the new approach was  
130 demonstrated by comparing the performance with the large universal reference database  
131 commonly applied. The comprehensive set of ESVs also allowed the design of species or  
132 sequence variant-specific oligonucleotide probes for fluorescence *in situ* hybridization  
133 (FISH). This was exemplified by new probes for one of the most abundant genera in Danish  
134 wastewater treatment systems, the *Tetrasphaera*, where it enabled the visual distinction of  
135 several species revealing different phenotypes.

136 **Materials and methods:**

137 ***General molecular methods***

138 Concentration and quality of nucleic acids were determined using a Qubit 3.0 fluorometer  
139 (Thermo Fisher Scientific) and an Agilent 2200 TapeStation (Agilent Technologies),  
140 respectively. Agencourt RNAClean XP and AMPure XP beads were used as described by  
141 the manufacturer, except for the washing steps, where 80% ethanol was used. RiboLock  
142 RNase inhibitor (Thermo Fisher Scientific) was added to the purified total RNA to  
143 minimise RNA degradation. All commercial kits were used according to the protocols  
144 provided by the manufacturer, unless otherwise stated. Oligonucleotides used in this study  
145 can be found in **Table S1**.

146

147 ***Samples and nucleic purification***

148 Activated sludge and anaerobic digester biomass were obtained as frozen aliquots (-80°C)  
149 from the MiDAS collection<sup>21</sup>. Sample metadata is provided in **Table S2**. Total nucleic  
150 acids were purified from 500 µL of sample thawed on ice using the PowerMicrobiome  
151 RNA isolation kit (MO BIO Laboratories) with the optional phenol-based lysis or with the  
152 RiboPure RNA purification kit for bacteria (Thermo Fisher Scientific). Purification was  
153 carried out according to the manufacturers' recommendations, except that cell lysis was  
154 performed in a FastPrep-24 instrument for 4x 40 s at 6.0 m/s to increase the yield of nucleic  
155 acids from bacteria with tough cell walls<sup>24</sup>. The samples were incubated on ice for 2 min  
156 between each bead beating to minimise heating due to friction. DNA-free total RNA was  
157 obtained by treating a subsample of the purified nucleic acid with the DNase Max kit (MO  
158 BIO Laboratories), followed by clean up using 1.0x RNAClean XP beads with elution into  
159 25 µL nuclease-free water.

160

161 ***Primer-free full-length 16S rRNA library preparation and sequencing***

162 Purified RNA obtained from biomass samples was pooled for each sample source type  
163 (activated sludge or anaerobic digester) to give equimolar amounts of the small subunit  
164 ribosomal ribonucleic acid (SSU rRNA) determined based on peak area in the TapeStation  
165 analysis software A.02.02 (SR1). Full-length SSU sequencing libraries were then prepared  
166 as previously described<sup>17</sup>. The SSU\_rRNA\_RT2 (activated sludge) and SSU\_rRNA\_RT3  
167 (anaerobic digester biomass) reverse transcription primer and the SSU\_rRNA\_1 adaptor  
168 were used for the molecular tagging, and approximately 1,000,000 tagged molecules from  
169 each pooled sample were used to create the clonal library. The final library was sequenced  
170 on a HiSeq2500 using on-board clustering and rapid run mode with a HiSeq PE Rapid  
171 Cluster Kit v2 (Illumina) and HiSeq Rapid SBS Kit v2, 265 cycles (Illumina), as previously  
172 described<sup>17</sup>.

173

174

175

176 ***Primer-based full-length 16S rRNA library preparation and sequencing***

177 The purified nucleic acids obtained from the biomass samples were pooled for each sample  
178 source type (activated sludge or anaerobic digester) with equal weight of DNA from each  
179 sample. Full-length SSU sequencing libraries were then prepared, as previously  
180 described<sup>17</sup>. The f16S\_rDNA\_pcr1\_fw1 (activated sludge) or f16S\_rDNA\_pcr1\_fw2  
181 (anaerobic digester biomass) and the f16S\_rDNA\_pcr1\_rv were used for the molecular  
182 tagging, and approximately 1,000,000 tagged molecules from each pooled sample were  
183 used to create the clonal library. The final library was sequenced on a HiSeq2500 using on-  
184 board clustering and rapid run mode with a HiSeq PE Rapid Cluster Kit v2 (Illumina) and  
185 HiSeq Rapid SBS Kit v2, 265 cycles (Illumina) as previously described<sup>17</sup>.

186

187 ***Preparation of full-length 16S rRNA gene exact sequence variants (ESVs)***

188 Raw sequence reads were binned, based on the unique molecular tags, *de novo* assembled  
189 into the synthetic long-read rRNA gene sequences using the fSSU-pipeline-DNA\_v1.2.sh  
190 or fSSU-pipeline-RNA\_v1.2.sh scripts script  
191 (<https://github.com/KasperSkytte/AutoTax>)<sup>17</sup>. The assembled 16S rRNA gene sequences  
192 were trimmed equivalent to *E. coli* position 8 and 1507 (RNA-based protocol) or 28 and  
193 1491 (DNA-based protocol), as previously described<sup>17</sup>. This ensures that the sequences  
194 have equal length and that primer binding sites are removed from the DNA-based  
195 sequences. Exact sequence variants (ESVs) were obtained by identifying unique  
196 sequences, which were observed at least twice, and discarding shorter ESVs that match  
197 exactly with longer ESVs using the ESVpipeline.sh shell script  
198 (<https://github.com/KasperSkytte/AutoTax>). For details see the supplementary results.

199

200 ***Taxonomy assignment to ESVs***

201 A complete taxonomy from kingdom to species was automatically assigned to each ESV  
202 using the AutoTax.sh scripts (<https://github.com/KasperSkytte/AutoTax>). In brief, this  
203 script identifies the closest relative of each ESV in the SILVA database, obtains the  
204 taxonomy for this sequence, and discards information at taxonomic ranks not supported by  
205 the sequence identity, based on the thresholds for taxonomic ranks proposed by Yarza *et*  
206 *al.*<sup>9</sup>. In addition, ESVs are *de novo* clustered using the UCLUST algorithm and the same  
207 thresholds. The *de novo* clusters are labelled based on the centroid ESV, and these labels  
208 act as a placeholder taxonomy, where there are gaps in the taxonomy obtained from  
209 SILVA. For details, see the supplementary results.

210

211 ***Amplicon sequencing and analysis***

212 Bacterial community analysis was performed by amplicon sequencing of the V1-3 variable  
213 region as previous described<sup>25</sup> using the 27F (AGAGTTTGATCCTGGCTCAG<sup>26</sup>) and  
214 534R (ATTACCGCGGCTGCTGG<sup>27</sup>) primers and the purified DNA from above. Forward  
215 reads were processed using usearch v.11.0.667. Raw fastq files were filtered for phiX

216 sequences using `-filter_phix`, trimmed to 250 bp using `-fastx_truncate -truncLen 250`, and  
217 quality filtered using `-fastq_filter` with `-fastq_maxee 1.0`. The sequences were dereplicated  
218 using `-fastx_uniques` with `-sizeout -relabel Uniq`. Exact amplicon sequence variants  
219 (ASVs) were generated using `-unoise34`. ASV-tables were created by mapping the raw  
220 reads to the ASVs using `-otutab` with the `-zotus` and `-strand` both options. Taxonomy was  
221 assigned to ASVs using `-sintax` with `-strand` both and `-sintax_cutoff 0.810`.

222

### 223 ***Data analysis and visualization***

224 Usearch v.10.0.240 was used for mapping sequences to references with `-usearch_global -`  
225 `id 0 -maxrejects 0 -strand plus`, unless otherwise stated. Data was imported into R<sup>28</sup> using  
226 RStudio IDE<sup>29</sup>, analysed, and aggregated using Tidyverse v.1.2.1  
227 (<https://www.tidyverse.org/>), and visualised using ggplot2<sup>30</sup> v.3.1.0 and Ampvis<sup>31</sup> v.2.4.0.

228

### 229 ***Data availability***

230 Raw and assembled sequencing data is available at the European Nucleotide Archive  
231 (<https://www.ebi.ac.uk/ena>) under the project number PRJEB26558.

232

### 233 ***Fluorescence in situ hybridization (FISH)***

234 Fresh biomass samples from full-scale activated sludge WWTP were fixed with 96%  
235 ethanol and stored in the freezer (-20°C) until needed. FISH was performed as described  
236 by Daims et al.<sup>32</sup>. Details about the optimal formamide concentration used for each probe  
237 are given in **Table S4**. The EUBmix probe set<sup>33,34</sup> was used to cover all bacteria, and the  
238 nonsense NON-EUB probe<sup>35</sup> was applied as negative control for sequence-independent  
239 probe binding. Microscopic analysis was performed with either an Axioskop  
240 epifluorescence microscope (Carl Zeiss, Germany), equipped with a Leica DFC7000 T  
241 CCD camera, or a white light laser confocal microscope (Leica TCS SP8 X) (Leica  
242 Microsystems, Wetzlar, Germany).

243

### 244 ***Phylogenetic analysis and FISH probe design***

245 Phylogenetic analysis of 16S rRNA gene sequences and the design of FISH probes for  
246 individual species in the genus *Tetrasphaera* were performed using the ARB software  
247 v.6.0.6<sup>36</sup>. A phylogenetic tree was calculated, based on the aligned 722 new ESVs from the  
248 genus *Tetrasphaera*, using the PhyML maximum likelihood method and a 1000-replicate  
249 bootstrap analysis. Unlabelled helper probes and competitor probes were designed for  
250 regions predicted to have low in situ accessibility and for single base mismatched non-  
251 target sequences, respectively. Potential probes were validated *in silico* with the MathFISH  
252 software for hybridization efficiencies of target and potentially weak non-target matches<sup>37</sup>.  
253 All probes were purchased from Sigma-Aldrich (Denmark) or Biomers (Germany),  
254 labelled with 6-carboxyfluorescein (6-Fam), indocarbocyanine (Cy3) or  
255 indodicarbocyanine (Cy5) fluorochromes. Optimal hybridization conditions for novel



256 FISH probes were determined, based on formamide dissociation curves, generated after  
257 hybridization at different formamide concentrations over a range of 0–70% (v/v) with 5%  
258 increments. Relative fluorescence intensities of 50 cells were measured with the ImageJ  
259 software (National Institutes of Health, Maryland, USA) and calculated average values  
260 were compared for selection of the optimal formamide concentration. Where available,  
261 pure cultures were obtained from DSMZ and applied in the optimization process.  
262 *Tetrasphaera japonica* (DSM13192) was used to optimize the probe Tetra183, while  
263 *Sanguibacter suarezii* (DSM10543), *Lactobacillus reuteri* (DSM20016), and *Janibacter*  
264 *melonis* (DSM16063) were used to assess the need for the specific unlabelled competitor  
265 probes Tetra67\_C1, Actino221\_C3, and Tetra732\_C1, respectively. If appropriate pure  
266 cultures were not available, probes were optimized using activated sludge biomass with a  
267 high abundance of the target organism predicted by amplicon sequencing.

268

### 269 ***Raman microspectroscopy***

270 Raman microspectroscopy was applied in combination with FISH, as previously  
271 described<sup>38</sup>. The approach was used to identify phenotypic differences between probe-  
272 defined *Tetrasphaera* phylotypes. Briefly, FISH was conducted on optically polished CaF<sub>2</sub>  
273 Raman windows (Crystran, UK), which give a single-sharp Raman marker at 321 cm<sup>-1</sup> that  
274 serves as an internal reference point in every spectrum. *Tetrasphaera* species-specific  
275 (Cy3) probes (**Table S4**) were used to locate the target cells for Raman analysis. After  
276 bleaching the Cy3 fluorophore with the Raman laser, spectra from single cells were  
277 obtained using a Horiba LabRam HR 800 Evolution (Jobin Yvon – France) equipped with  
278 a Torus MPC 3000 (UK) 532 nm 341 mW solid-state semiconductor laser. The Raman  
279 spectrometer was calibrated prior to obtaining all measurements to the first-order Raman  
280 signal of Silicon, occurring at 520.7 cm<sup>-1</sup>. The incident laser power density on the sample  
281 was attenuated down to 2.1 mW/μm<sup>2</sup> using a set of neutral density (ND) filters. The Raman  
282 system is equipped with an in-built Olympus (model BX-41) fluorescence microscope. A  
283 50X, 0.75 numerical aperture dry objective (Olympus M Plan Achromat- Japan), with a  
284 working distance of 0.38 mm, was used throughout the work. A diffraction grating of 600  
285 mm/groove was used, and the Raman spectra collected spanned the wavenumber region of  
286 200 cm<sup>-1</sup> to 1800 cm<sup>-1</sup>. The slit width of the Raman spectrometer and the confocal pinhole  
287 diameter were set to 100 μm and 72 μm, respectively. Raman spectrometer operation and  
288 subsequent processing of spectra were conducted using LabSpec version 6.4 software  
289 (Horiba Scientific, France). All spectra were baseline corrected using a 6<sup>th</sup> order  
290 polynomial fit.

291

292 **Results and discussion:**

293

294 *A comprehensive ecosystem-specific 16S rRNA gene reference database*

295 In order to make a comprehensive ecosystem-specific reference database for Danish  
296 wastewater treatment plants (WWTPs) and their anaerobic digesters, we sampled biomass  
297 from 22 WWTPs and 16 anaerobic digesters (ADs) treating waste activated sludge located  
298 at Danish wastewater treatment facilities, all representative for Danish treatment facilities  
299 (**Table S2**). These facilities represent an important engineered ecosystem containing both  
300 bacterial and archaeal complex communities, with the vast majority of microbes being  
301 uncultured and poorly characterized<sup>39</sup>.

302

303 DNA and RNA were extracted and pooled separately for each environment and used to  
304 create ecosystem-specific primer-based (DNA-based) and “primer-free” (RNA-based)  
305 fSSU libraries (**Figure 1a**). This resulted in a total of 926,507 fSSU sequences after quality  
306 filtering. A comprehensive reference database was constructed by accepting only  
307 sequences observed at least twice. We refer to these sequences as exact sequence variants  
308 (ESVs). As each fSSU is independently amplified due to the unique molecular identifiers  
309 (UMIs) added before the PCR amplification steps, the risk of having multiple ESVs with  
310 identical errors is extremely low if we assume random distribution of errors (see  
311 supplementary results). ESVs are therefore considered to be essentially error-free. The final  
312 ESV database contained 21,039 unique full-length rRNA gene sequences.

313

314 To determine the influence of library preparation method, we compared ESVs created  
315 based on fSSU obtained from the four individual libraries. The DNA-based approach  
316 yielded approx. 20 times more unique ESVs than the RNA-based approach for the same  
317 sequencing cost (**Table S3**). The reduced number of unique ESVs from the RNA-based  
318 libraries was expected, as only 13.3% of the assembled sequences represented full-length  
319 16S rRNA gene sequences (**Table S3**). As the Archaea are not targeted by the primers  
320 used, we compared the bacterial ESVs from the four libraries to assess the influence of  
321 primer bias (**Figure 1b**). This revealed that 27% and 32% of the unique ESVs identified in  
322 the shallow RNA-based libraries were not present in corresponding DNA-based libraries  
323 for activated sludge and anaerobic digesters, respectively. This reveals a clear bias  
324 associated with the DNA-based method, which is in accordance with our previous *in silico*  
325 evaluation of primer bias for the 27F and 1492R primer pair<sup>17</sup>. The same analysis predicted  
326 that a better coverage could be achieved by using the 27F and 1391R primer pair<sup>40</sup> on the  
327 expense of sequence length<sup>17</sup>.

328

329 To estimate the number of ESVs belonging to novel taxa, these were mapped to the  
330 SILVA\_132\_SSURef\_Nr99 database<sup>12</sup>, and the identity of the closest relative was  
331 compared to the thresholds for taxonomic ranks proposed by Yarza *et al.*<sup>9</sup> (**Table 1**). The

332 majority of the ESVs (~96%) had references in the SILVA database with genus-level  
333 support (identity >94.5%), but 20% lacked references above the species-level (identity >  
334 98.7%) (**Table 1**), which are crucial to confident taxonomic classification<sup>10</sup>.

335

### 336 *Evaluation of the ESV database using amplicon data*

337 In order to evaluate if the ESV database contained high-identity references for all  
338 prokaryotes in the ecosystem, we mapped V1-3 amplicon sequencing data obtained from  
339 two sources: the same samples used to create the ESV database and samples from unrelated  
340 Danish WWTP and ADs. To ensure maximal resolution, amplicon data was processed into  
341 ASVs. The ecosystem-specific ESV database (21,039 seq.) included more high-identity  
342 references for all analyzed samples, compared to 25-150-fold larger universal databases,  
343 such as MiDAS 2.1 (548,447 seq.)<sup>21</sup>, SILVA v.132 SSURef Nr99 (695,171 seq.), SILVA  
344 v.132 SSURef (2,090,668 seq.), GreenGenes 16S v.13.5 (1,262,986 seq.), and the full RDP  
345 v.11.5 (3,356,808 seq.) (**Figure 1c and Figure S1-S2**). A decrease in percentage of ASVs  
346 with high-identity references was observed when ASVs with lower abundance were  
347 included in the analysis. However, the ESV database still performed as well as the larger  
348 universal databases.

349

350 Since only Danish WWTPs and ADs were used to establish the comprehensive high-  
351 identity ESV reference database, published amplicon data from non-Danish WWTPs<sup>41,42</sup>  
352 was also evaluated (**Figure 1d-e, and S3-S4**). Compared to all universal reference  
353 databases, the Danish reference ESVs performed better or similar for most of the  
354 investigated non-Danish WWTPs, although not as well as for the Danish plants, further  
355 demonstrating the advantage of using ecosystems-specific databases. The inclusion of  
356 sequences from non-Danish WWTP and ADs will likely improve classification for plants  
357 globally.

358

### 359 *A new comprehensive taxonomic framework*

360 A major limitation in the classification of amplicon data from environmental samples is  
361 the lack of lower rank taxonomic information (family, genus, and species names) for many  
362 uncultivated bacteria in the universal reference databases. To address this, we developed a  
363 robust taxonomic framework (AutoTax), which provides consistent taxonomic  
364 classification of all sequences to all seven taxonomic ranks by using a reproducible  
365 computational approach, based on identity thresholds (**Figure 2**).

366

367 The ESVs were first mapped to the SILVA\_SSURef\_Nr99 database, which provides the  
368 taxonomy of the closest relative in the database as well as the identity between the ESV  
369 and this reference. The taxonomy was assigned to the ESV down to the taxonomic rank  
370 that is supported by the sequence identity thresholds proposed by Yarza *et al.*<sup>9</sup>. As the  
371 SILVA taxonomy does not include species names, ESVs were also mapped to 16S rRNA

372 gene sequences from type strains extracted from the SILVA database. Species names were  
373 added to the ESVs if the identity was above 98.7%, and the genus name obtained from the  
374 type strains was identical to that obtained from the full reference database. Although there  
375 are examples of separate species with 16S rRNA genes that share more than 98.7%  
376 sequence similarity and genomes with intragenomic copies that are less than 98.7% similar,  
377 these are exceptions rather than the norm<sup>43,44</sup>. The approach used here will therefore  
378 provide correct species-level classifications for the vast majority of the ESVs.

379

380 To fill gaps in the taxonomy, all ESVs were trimmed and clustered using the UCLUST  
381 cluster\_smallmem algorithm and the taxonomic thresholds proposed by Yarza *et al.*<sup>9</sup>. With  
382 this algorithm sequences are processed in the order they appear in the input file, i.e., if the  
383 next sequence matches an existing centroid, it is assigned to that cluster, otherwise it  
384 becomes the centroid of a new cluster. This ensures that the same clusters and centroids  
385 are formed every time, even if additional ESVs are appended to the reference database.  
386 The reproducibility of the approach was confirmed by processing only the first half of the  
387 ESVs, which yielded identical clusters. Merging of the SILVA- and the *de novo*-based  
388 taxonomies may result in conflicts (e.g., multiple ESVs from the same species associate  
389 with different genera). When this is the case, the taxonomy for the ESV, which first appears  
390 in the reference database, is adapted for all ESVs within that species. The pipeline produces  
391 formatted reference databases, which can be directly used for classification using syntax or  
392 classifiers in the qiime2 framework.

393

394 AutoTax provided placeholder names for many previously undescribed taxa (**Table 2**,  
395 **Figure S5**). Strikingly, essentially all species, more than 70% of all genera, 50% of all  
396 families, and 30% of all orders obtained their names from the *de novo* taxonomy and would  
397 otherwise have remained unclassified. The novel taxa were affiliated with several phyla,  
398 especially the Proteobacteria, Planctomycetes, Patescibacteria, Firmicutes, Chloroflexi,  
399 Bacteroidetes, Actinobacteria, and Acidobacteria (**Figure S5**). A prominent example is the  
400 Chloroflexi, where only 10/14 orders, 8/33 families, and 10/151 genera observed here were  
401 classified using the SILVA database, clearly showing the need for an improved taxonomy.  
402 This will have important implications for the study of these communities, given the high  
403 diversity and abundance of members of this phylum and their association with the  
404 sometimes serious operational problems of bulking and foaming<sup>45,46</sup>.

405

406 To benchmark the ESV database, we classified amplicon data obtained from activated  
407 sludge and anaerobic digester samples using this database and compared the results to  
408 classifications obtained from the universal reference databases (**Figure 3a**). The ESV  
409 database was able to classify many more of the ASVs to the genus level (~90%), compared  
410 to MiDAS 2.1 (~65%), SILVA\_132\_SSURef\_Nr99 (~45%), GreenGenes\_16s\_13.5 (25-  
411 30%), and the RDP\_16S\_v16 training set (25%). Importantly, many of the top 50 most

412 abundant ASVs only received classification with the ESV database (**Figure 4 and S6**). The  
413 use of the ESV database thus significantly improved the classification at all taxonomic  
414 levels and, importantly, provided species-level classifications for the majority of the ASVs  
415 (~85%).

416

417 Confident classification of amplicon sequences based on reference databases can be  
418 difficult due to the limited taxonomic information in short sequences<sup>9,10</sup>. To investigate the  
419 confidence of the amplicon classification, we extracted amplicon sequence sets *in silico*  
420 from the ESVs, corresponding to commonly amplified 16S rRNA regions. These  
421 amplicons were classified using syntax and the full-length ESV database. We then  
422 calculated the fraction of amplicons, which was correctly classified to the same genus and  
423 species as their source ESV (**Figure 3b**). Nearly 100% of the amplicons were assigned to  
424 the correct genus and 86-96% to the correct species, depending on primer set used to trim  
425 the sequences. The primers targeting the V1-3 variable region performed especially well  
426 for species-level identification (96% correct classifications), while the commonly used  
427 primers targeting the V4 variable region were among the worst (89% correct  
428 classifications). Similar levels of classification were also obtained when only the trimmed  
429 forward reads (250 bp) were used, compared to the merged forward and reverse reads  
430 (95.93% and 95.87% correct species-level classification, respectively; **Figure 3b**). This  
431 demonstrated that the use of a comprehensive, high-quality database allows the confident  
432 classification of ASV sequences to the genus to species level.

433

434 When choosing primers for amplicon sequence analyses, it is important also to take primer-  
435 bias into account<sup>24</sup>. If a poor choice is made, process-relevant species may not appear, or  
436 they may be severely underestimated. For activated sludge, it has previously been shown  
437 that the V1-3 primers have a good overall agreement with metagenomic data and capture  
438 many of the process-relevant organisms, whereas the V4 primers underestimate the  
439 abundance of the process-critical Chloroflexi and Actinobacteria<sup>24</sup>. Access to a  
440 comprehensive ecosystem-specific full-length 16S rRNA gene database provides an  
441 opportunity to determine the theoretical coverage of different primer sets *in silico* for the  
442 given ecosystem so that an informed decision can be made<sup>40,47</sup>.

443

#### 444 ***Species-specific FISH probes for Tetrasphaera spp.***

445 A valuable benefit for the generation of ecosystem-specific databases is the design and  
446 selection of probes and primers for specific populations. FISH-based visualization of  
447 populations is central to many studies in microbial ecology, yet with the expanding 16S  
448 rRNA gene databases, finding probe sites allowing confident differentiation of target  
449 lineages is becoming increasingly difficult. Probe specificity and coverage are routinely  
450 assessed, based on all the sequences in public databases, yet both parameters may be very  
451 different when considering only the microorganisms present in the ecosystem of study. The

452 use of ecosystem-specific databases therefore provides a more accurate assessment of  
453 probe specificity and coverage and will likely also allow the confident design and  
454 application of probes for targeting lineages at a higher taxonomic resolution, such as  
455 species.

456

457 To illustrate the benefit of using the new high-quality reference ESV database, more  
458 detailed analyses of the genus *Tetrasphaera* were performed. It is the most abundant genus  
459 in Danish WWTPs<sup>21</sup> and is associated with the polyphosphate-accumulating organism  
460 (PAO) phenotype, important for the capture and removal of phosphorus in the  
461 WWTPs<sup>38,48,49</sup>. Despite the importance of the genus, it is unknown how many species co-  
462 exist in these systems and whether they all possess the PAO metabolism. Phylogenetic  
463 analysis of 722 ESVs belonging to the genus *Tetrasphaera* retrieved in this study revealed  
464 an evident separation into 18 species across 22 Danish WWTPs, providing for the first time  
465 a comprehensive overview of the diversity of *Tetrasphaera* in activated sludge systems  
466 (**Figure 5a**). Several of the retrieved sequences are identical to those of the described pure  
467 cultures, while the majority are novel and not present in existing databases. The 10 most  
468 abundant species are shown in **Figure 5b**. In order to reveal possible variations in  
469 morphology and physiology of *Tetrasphaera*, the new ESV database was used to design a  
470 comprehensive set of FISH probes covering the abundant species (**Figure 5a**). Of those,  
471 only the two most abundant species in Danish WWTPs were targeted by the existing probes  
472 (Actino-658 and Actino-221)<sup>50</sup> with high specificity and coverage. Other existing FISH  
473 probes targeting genus *Tetrasphaera*<sup>48</sup> did not show *in silico* high specificity and/or  
474 coverage. The new species-specific probes designed to target the remaining abundant  
475 species, which can create up to 2-3% of the biomass in some plants (**Figure 5a**), revealed  
476 different morphologies (rod-shaped cells, tetrads, filaments, **Figure 5c**). Having probes for  
477 these different species most importantly allows *in situ* single cell analyses for each. Using  
478 these FISH probes in combination with Raman microspectroscopy, it was confirmed that  
479 all the FISH-defined *Tetrasphaera* species were likely PAOs, based on the presence of a  
480 large peak for poly-P ( $1170\text{ cm}^{-1}$ , **Figure 5d**). No Raman peaks were found for other  
481 intracellular storage compounds such as glycogen, PHA, or trehalose – consistent with  
482 current models for the physiology of the genus in these systems. Additionally, the new  
483 reference database was used to design a probe set (Tetra183 + Tetra617) for genus-level  
484 screenings of all abundant species of *Tetrasphaera* in Danish plants for (**Figure 5a**), which  
485 was otherwise not possible.

486

#### 487 **Concluding remarks**

488 The current study demonstrates how high-throughput full-length 16S rRNA gene  
489 sequencing can be combined with a sequence identity-based approach to automatically  
490 establish near-complete ecosystems-specific reference databases. These databases were

491 shown to be superior to the much larger public versions for microbial community analyses,  
492 including their use for amplicon sequencing and FISH analyses.

493

494 The comprehensive taxonomy and high-identity reference sequences for all abundant  
495 microbes from the selected ecosystem greatly improve the specificity of taxonomic  
496 classification of amplicons to the sub-genus to sub-species level. It also provides the design  
497 and confident use of FISH probes that can be used to illuminate the morphological and  
498 functional diversity at sub-genus level *in situ*, as exemplified here for the genus  
499 *Tetrasphaera*. The assessment of probe specificity and coverage is more meaningful using  
500 the smaller ecosystem-specific database, compared to the much larger, but broader, public  
501 versions, given the possible inclusion of poor-quality sequences and those from  
502 microorganisms not observed in the system studied in the latter.

503

504 The sequence identity-based approach for automated taxonomy assignment (AutoTax)  
505 represents a simple, cost effective strategy to provide a comprehensive taxonomy for all  
506 seven major taxonomic ranks within a short time frame (a few hours for the database  
507 created here). The use of a large curated database (SILVA) as the backbone of the  
508 taxonomy assignment ensures that the primary classification is in accordance with the  
509 current consensus within microbial taxonomy. As, with time, ESVs are introduced into the  
510 public databases and their taxonomies are manually curated, this will further improve the  
511 ESV classifications by AutoTax. The assignment of placeholder names for unclassified  
512 taxa based on sequence clustering provides stable reference names, which can act as  
513 surrogates until the taxa receive true taxonomic classifications. Although the sequence  
514 similarity clustering does not necessarily reflect the true evolutionary history of the  
515 microbes or the phenotypic characteristics, it still provides clusters that are of similar  
516 diversity to true taxa at the same taxonomic rank.

517

518 The AutoTax pipeline was optimized here for use with the SILVA database, but can easily  
519 be adapted for use with other reference databases. An interesting example could be the  
520 rapidly expanding genome taxonomy database (GTDB), which provides a standardized  
521 bacterial taxonomy for all taxonomic ranks, including the species level, based on genome  
522 phylogeny of single copy marker genes extracted from metagenome assembled genomes  
523 (MAGs)<sup>51</sup>. The approach can also be applied to provide placeholder taxonomies for gaps  
524 in the large public database, such as SILVA, GreenGenes, and RDP; noting that this will  
525 improve the classification rate for sequences, but will probably not provide the same  
526 resolution as the ecosystem-specific databases.

527

528 We believe the presented approach will have profound impact on the future of microbial  
529 community analyses in many fields, including the water sector, soil microbiology, and  
530 human health. The robust taxonomic framework will provide a common language for

531 scientific communities, which we anticipate will ease the sharing of microbial knowledge  
532 and provide a platform for linking microbial identity with biological functions.

533

534 **Acknowledgements**

535 The project has been funded by the Danish Research Council (grant 6111-00617A), the  
536 Villum foundation (Dark Matter and grant 13351), and 25 wastewater treatment plants.

537

538

539 **Conflict of interest:**

540 The authors declare no conflict of interest.

541



542 **References:**

- 543 1. Martiny, J. B. H., Jones, S. E., Lennon, J. T. & Martiny, A. C. Microbiomes in  
544 light of traits: A phylogenetic perspective. *Science* (80-. ). **350**, aac9823-18 (2015).
- 545 2. Single-, D. R. R. & Sequence, N. C. Deblur Rapidly Resolves Single-. **2**, 1–7  
546 (2017).
- 547 3. Callahan, B. J. *et al.* DADA2: High-resolution sample inference from Illumina  
548 amplicon data. *Nat. Methods* **13**, 581–583 (2016).
- 549 4. Edgar, R. C. UNOISE2: improved error-correction for Illumina 16S and ITS  
550 amplicon sequencing. *bioRxiv* 81257 (2016). doi:10.1101/081257
- 551 5. Caporaso, J. G. *et al.* Global patterns of 16S rRNA diversity at a depth of millions  
552 of sequences per sample. *Proc. Natl. Acad. Sci.* (2010).  
553 doi:10.1073/pnas.1000080107
- 554 6. Callahan, B. J., McMurdie, P. J. & Holmes, S. P. Exact sequence variants should  
555 replace operational taxonomic units in marker-gene data analysis. *ISME J.* **11**,  
556 2639–2643 (2017).
- 557 7. Thompson, L. R. *et al.* A communal catalogue reveals Earth’s multiscale microbial  
558 diversity. *Nature* **551**, 457–463 (2017).
- 559 8. Mcdonald, D. *et al.* American Gut : an Open Platform for Citizen Science.  
560 *mSystems* **3**, 1–28 (2018).
- 561 9. Yarza, P. *et al.* Uniting the classification of cultured and uncultured bacteria and  
562 archaea using 16S rRNA gene sequences. *Nat. Rev. Microbiol.* **12**, 635–645  
563 (2014).
- 564 10. Edgar, R. C. Accuracy of taxonomy prediction for 16S rRNA and fungal ITS  
565 sequences. *PeerJ* **6**, e4652 (2018).
- 566 11. Desantis, T. Z. *et al.* Greengenes , a Chimera-Checked 16S rRNA Gene Database  
567 and Workbench Compatible with ARB. **72**, 5069–5072 (2006).
- 568 12. Quast, C. *et al.* The SILVA ribosomal RNA gene database project: Improved data  
569 processing and web-based tools. *Nucleic Acids Res.* **41**, D590-6 (2013).
- 570 13. Cole, J. R. *et al.* Ribosomal Database Project: data and tools for high throughput  
571 rRNA analysis. *Nucleic Acids Res.* **42**, D633-42 (2014).
- 572 14. Ritari, J., Salojärvi, J., Lahti, L. & de Vos, W. M. Improved taxonomic assignment  
573 of human intestinal 16S rRNA sequences by a dedicated reference database. *BMC*  
574 *Genomics* **16**, 1056 (2015).
- 575 15. Segota, I. & Long, T. A high-resolution pipeline for 16S-sequencing identifies  
576 bacterial strains in human microbiome. (2019).
- 577 16. Chen, T. *et al.* The Human Oral Microbiome Database: a web accessible resource  
578 for investigating oral microbe taxonomic and genomic information. *Database*  
579 (*Oxford*). **2010**, baq013 (2010).
- 580 17. Karst, S. M. *et al.* Retrieval of a million high-quality , full-length microbial 16S  
581 and 18S rRNA gene sequences without primer bias. *Nat. Biotechnol.* **36**, 190–195  
582 (2018).
- 583 18. Burke, C. M. & Darling, A. E. A method for high precision sequencing of near  
584 full-length 16S rRNA genes on an Illumina MiSeq. *PeerJ* **4**, e2492 (2016).
- 585 19. Callahan, B. J. *et al.* High-throughput amplicon sequencing of the full-length 16S  
586 rRNA gene with single-nucleotide resolution. *bioRxiv* 392332 (2019).  
587 doi:10.1101/392332

- 588 20. Karst, S. M., Ziels, R. M., Kirkegaard, R. H. & Albertsen, M. Enabling high-  
589 accuracy long-read amplicon sequences using unique molecular identifiers and  
590 Nanopore sequencing. *bioRxiv* 645903 (2019). doi:10.1101/645903
- 591 21. McIlroy, S. J. *et al.* MiDAS 2.0: An ecosystem-specific taxonomy and online  
592 database for the organisms of wastewater treatment systems expanded for  
593 anaerobic digester groups. *Database* **2017**, 1–9 (2017).
- 594 22. Newton, R. J., Jones, S. E., Eiler, A., McMahon, K. D. & Bertilsson, S. *A Guide to*  
595 *the Natural History of Freshwater Lake Bacteria. Microbiology and Molecular*  
596 *Biology Reviews* **75**, (2011).
- 597 23. Glöckner, F. O. *et al.* 25 years of serving the community with ribosomal RNA  
598 gene reference databases and tools. *J. Biotechnol.* **261**, 169–176 (2017).
- 599 24. Albertsen, M., Karst, S. M., Ziegler, A. S., Kirkegaard, R. H. & Nielsen, P. H.  
600 Back to basics - the influence of DNA extraction and primer choice on  
601 phylogenetic analysis of activated sludge communities. *PLoS One* **10**, e0132783  
602 (2015).
- 603 25. Kirkegaard, R. H. *et al.* The impact of immigration on microbial community  
604 composition in full-scale anaerobic digesters. *Sci. Rep.* **7**, (2017).
- 605 26. Lane, D. J. 16S/23S rRNA sequencing. in *Nucleic Acid Techniques in Bacterial*  
606 *Systematics* (eds. Stackebrandt, E. & Goodfellow, M.) 115–175 (John Wiley and  
607 Sons, 1991). doi:10.1007/s00227-012-2133-0
- 608 27. Muyzer G Uitterlinden AG., de W. E. C. Profiling of complex microbial  
609 populations by denaturing gradient gel electrophoresis analysis of polymerase  
610 chain reaction-amplified genes coding for 16S rRNA. *AEM* **59**, 695–700 (1993).
- 611 28. R Core Team. R: A language and environment for statistical computing. (2016).
- 612 29. RStudio Team. RStudio: Integrated Development Environment for R. (2015).
- 613 30. Wickham, H. *ggplot2 - Elegant Graphics for Data Analysis. Springer* (Springer  
614 Science & Business Media, 2009). doi:10.1007/978-0-387-98141-3
- 615 31. Andersen, K. S. S., Kirkegaard, R. H., Karst, S. M. & Albertsen, M. ampvis2: an R  
616 package to analyse and visualise 16S rRNA amplicon data. *bioRxiv* 299537  
617 (2018). doi:10.1101/299537
- 618 32. Daims, H., Stoecker, K. & Wagner, M. Fluorescence in situ hybridization for the  
619 detection of prokaryotes. *Mol. Microb. Ecol.* **213**, 239 (2005).
- 620 33. Amann, R. I. *et al.* Combination of 16S rRNA-targeted oligonucleotide probes  
621 with flow cytometry for analyzing mixed microbial populations. *Appl Env.*  
622 *Microbiol* **56**, 1919–1925 (1990).
- 623 34. Daims, H., Brühl, A., Amann, R., Schleifer, K. H. & Wagner, M. The domain-  
624 specific probe EUB338 is insufficient for the detection of all Bacteria:  
625 development and evaluation of a more comprehensive probe set. *Syst Appl*  
626 *Microbiol* **22**, 434–444 (1999).
- 627 35. Wallner, G., Amann, R. & Beisker, W. Optimizing fluorescent *in situ*  
628 hybridization with rRNA-targeted oligonucleotide probes for flow cytometric  
629 identification of microorganisms. *Cytometry* **14**, 136–143 (1993).
- 630 36. Ludwig, W. *et al.* ARB: A software environment for sequence data. *Nucleic Acids*  
631 *Res.* **32**, 1363–1371 (2004).
- 632 37. Yilmaz, L. S., Parnerkar, S. & Noguera, D. R. MathFISH, a web tool that uses  
633 thermodynamics-based mathematical models for *in silico* evaluation of

- 634 oligonucleotide probes for fluorescence *in situ* hybridization. *Appl. Environ.*  
635 *Microbiol.* **77**, 1118–1122 (2011).
- 636 38. Fernando, E. Y. *et al.* Resolving the individual contribution of key microbial  
637 populations to enhanced biological phosphorus removal with Raman-FISH. *ISME*  
638 *J.* (2019). doi:10.1101/387795
- 639 39. Wu, L. *et al.* Global diversity and biogeography of bacterial communities in  
640 wastewater treatment plants. *Nat. Microbiol.* (2019). doi:10.1038/s41564-019-  
641 0426-5
- 642 40. Klindworth, A. *et al.* Evaluation of general 16S ribosomal RNA gene PCR primers  
643 for classical and next-generation sequencing-based diversity studies. *Nucleic Acids*  
644 *Res.* **41**, 1–11 (2013).
- 645 41. Isazadeh, S., Jauffur, S. & Frigon, D. Bacterial community assembly in activated  
646 sludge: mapping beta diversity across environmental variables. *Microbiologyopen*  
647 **5**, 1050–1060 (2016).
- 648 42. Gonzalez-Martinez, A. *et al.* Comparison of bacterial communities of conventional  
649 and A-stage activated sludge systems. *Sci. Rep.* **6**, (2016).
- 650 43. Kim, M., Oh, H.-S. S., Park, S.-C. C. & Chun, J. Towards a taxonomic coherence  
651 between average nucleotide identity and 16S rRNA gene sequence similarity for  
652 species demarcation of prokaryotes. *Int. J. Syst. Evol. Microbiol.* **64**, 346–351  
653 (2014).
- 654 44. Větrovský, T. & Baldrian, P. The Variability of the 16S rRNA Gene in Bacterial  
655 Genomes and Its Consequences for Bacterial Community Analyses. *PLoS One* **8**,  
656 1–10 (2013).
- 657 45. McIlroy, S. J. S. J. *et al.* Genomic and *in situ* investigations of the novel  
658 uncultured Chloroflexi associated with 0092 morphotype filamentous bulking in  
659 activated sludge. *ISME J (In press)*, 1–12 (2016).
- 660 46. Petriglieri, F., Nierychlo, M., Nielsen, P. H., Jon, S. & Id, M. *In situ* visualisation  
661 of the abundant Chloroflexi populations in full-scale anaerobic digesters and the  
662 fate of immigrating species. 1–14 (2018).
- 663 47. Walters, W. A. *et al.* PrimerProspector: De novo design and taxonomic analysis of  
664 barcoded polymerase chain reaction primers. *Bioinformatics* **27**, 1159–1161  
665 (2011).
- 666 48. Nguyen, H. T. T., Le, V. Q., Hansen, A. A., Nielsen, J. L. & Nielsen, P. H. High  
667 diversity and abundance of putative polyphosphate-accumulating Tetrasphaera-  
668 related bacteria in activated sludge systems. *FEMS Microbiol. Ecol.* **76**, 256–267  
669 (2011).
- 670 49. Marques, R. *et al.* Metabolism and ecological niche of Tetrasphaera and Ca.  
671 Accumulibacter in enhanced biological phosphorus removal. *Water Res.* **122**, 159–  
672 171 (2017).
- 673 50. Kong, Y., Nielsen, J. L. & Nielsen, P. H. Identity and Ecophysiology of  
674 Uncultured Actinobacterial Polyphosphate-Accumulating Organisms in Full-Scale  
675 Enhanced Biological Phosphorus Removal Plants. *Appl. Environ. Microbiol.* **71**,  
676 4076 LP – 4085 (2005).
- 677 51. Parks, D. H. *et al.* A standardized bacterial taxonomy based on genome phylogeny  
678 substantially revises the tree of life. *Nat. Biotechnol.* **36**, 996 (2018).
- 679 52. Peterson, J. *et al.* The NIH Human Microbiome Project. *Genome Res.* **19**, 2317–

- 680 2323 (2009).  
681 53. Apprill, A., McNally, S., Parsons, R. & Weber, L. Minor revision to V4 region  
682 SSU rRNA 806R gene primer greatly increases detection of SAR11  
683 bacterioplankton. *Aquat. Microb. Ecol.* **75**, 129–137 (2015).  
684 54. Parada, A. E., Needham, D. M. & Fuhrman, J. A. Every base matters: Assessing  
685 small subunit rRNA primers for marine microbiomes with mock communities,  
686 time series and global field samples. *Environ. Microbiol.* **18**, 1403–1414 (2016).  
687

688 **Figures:**

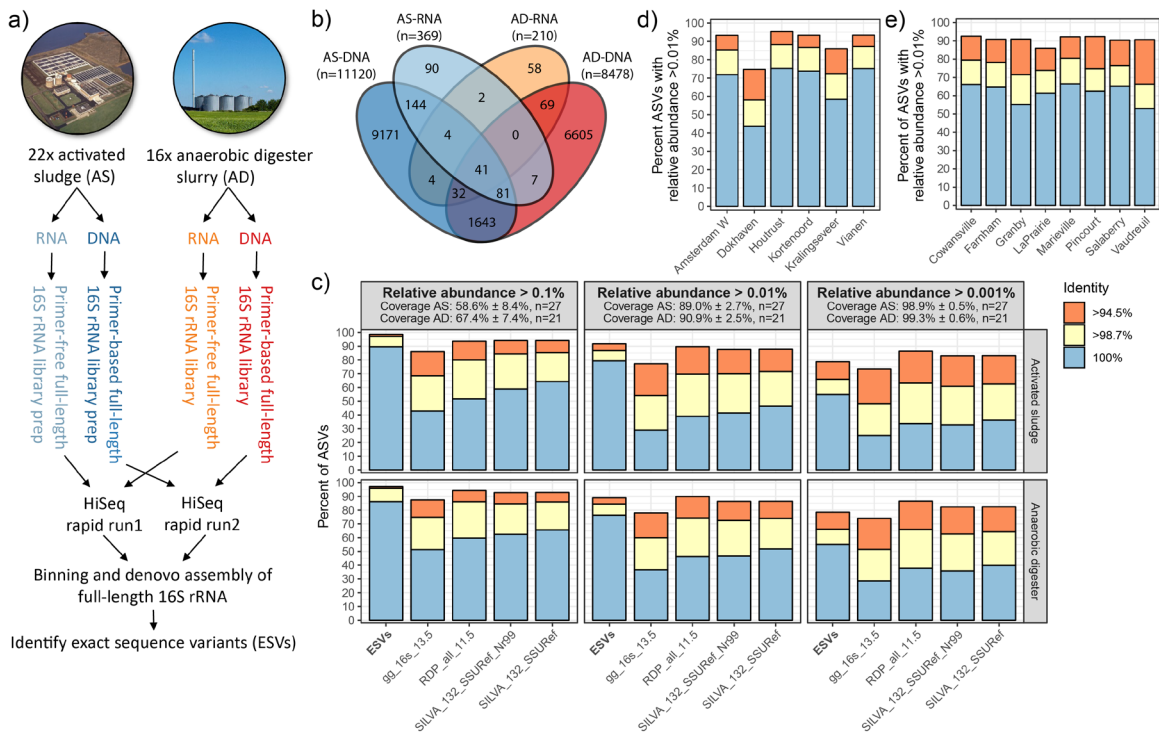

689

690 **Figure 1. Construction and evaluation of the ESV reference database.** a) Preparation  
 691 of ESVs. Samples were collected from WWTPs and anaerobic digesters, and DNA and  
 692 RNA were extracted. Purified DNA or RNA were used for preparation of primer-based  
 693 and “primer-free” full-length 16S rRNA libraries, respectively. These were sequenced and  
 694 processed bioinformatically to produce a comprehensive ecosystem-specific full-length  
 695 16S rRNA ESV database. A detailed description is provided in the supplementary results.  
 696 b) Venn-diagram showing bacterial ESVs shared between individual libraries. c) Mapping  
 697 of V1-3 amplicon data to the ESV database and common 16S rRNA reference databases.  
 698 ASVs were obtained from activated sludge and anaerobic digester samples, and ASVs were  
 699 filtered, based on their relative abundance, before the analysis to uncover the depth of the  
 700 ESV database. The fraction of the microbial community remaining after the filtering  
 701 (coverage) is shown as mean  $\pm$  standard deviation across plants. d) Mapping of ASVs from  
 702 Dutch WWTPs based on raw data from Gonzarlez-Martinez *et al.* 42. For details, see Figure  
 703 S3. e) Mapping of ASVs from Canadian WWTPs, based on raw data from Isazadeh *et al.*  
 704 2016 41. For details, see Figure S4.

705

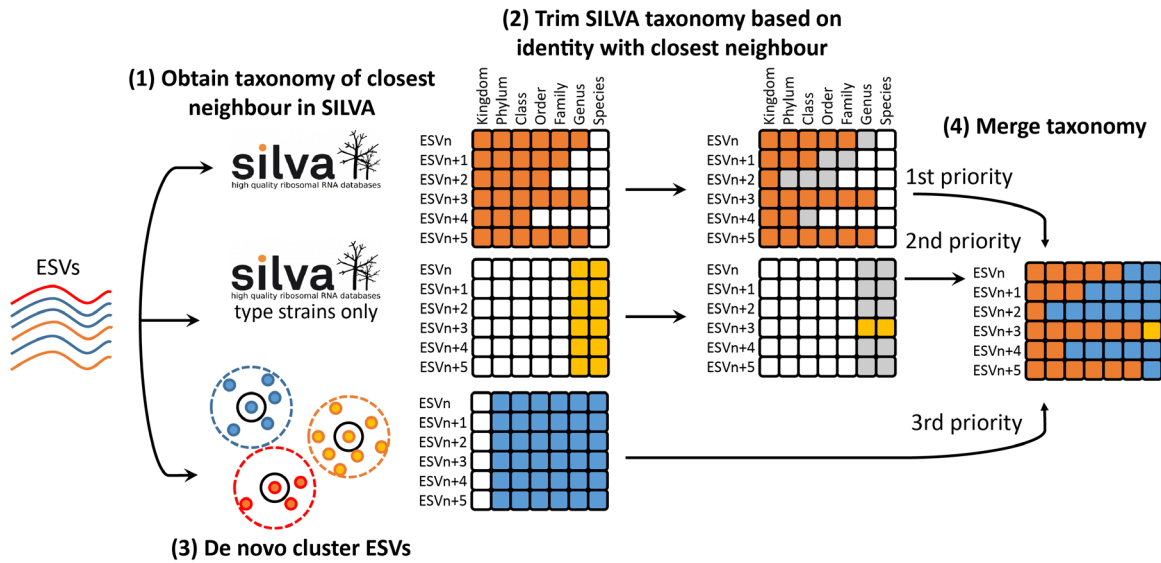

706

707

708

709

710

711

712

713

714

715

716

717

718

**Figure 2. The AutoTax taxonomic framework.** (1) ESVs were first mapped to the SILVA\_132\_SSURef\_Nr99 database to identify the closest relative. (2) Taxonomy was adopted from this sequence after trimming, based on identity and the taxonomic thresholds proposed by Yarza *et al.*<sup>9</sup>. To gain species information, ESVs were also mapped to sequences from type strains extracted from the SILVA database, and species names were adopted if the identity was >98.7% and the type strain genus matched that of the closest relative in the complete database. (3) ESVs were also clustered by greedy clustering at different identities, corresponding to the thresholds proposed by Yarza *et al.*<sup>9</sup> to generate a stable *de novo* taxonomy. (4) Finally, a comprehensive taxonomy was obtained by filling gaps in the SILVA-based taxonomy with the *de novo*-taxonomy.

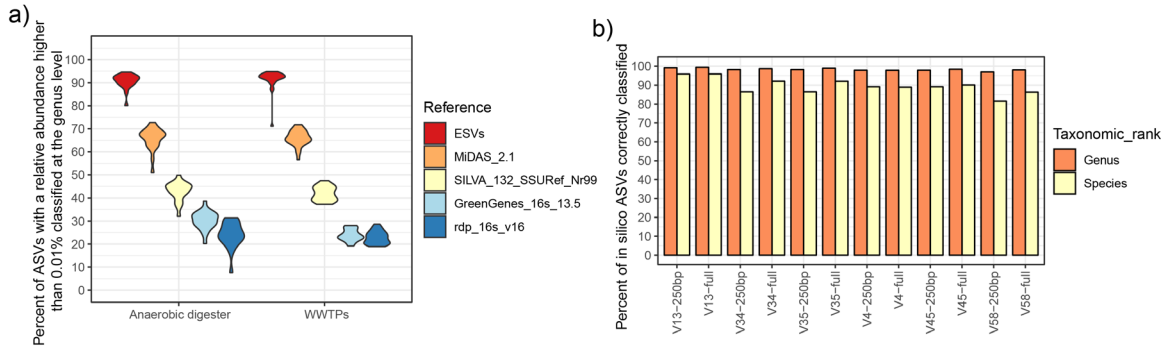

719

720

721

722

723

724

725

726

727

728

729

730

**Figure 3. Classification of amplicons.** a) Percentage of ASVs from each activated sludge and anaerobic digester sample with a relative coverage of more than 0.01% that were classified to the genus level when classified using the ESV reference database or common reference databases for taxonomic classification. b) Classification of *in silico* ASVs, corresponding to amplicons produced using common primer set on the ESVs. Results are shown for the full amplicons as well as for partial amplicons, equivalent to 250 bp forward reads of the amplicons. V13 (Lane 1991)<sup>26</sup>, V34 (Klindworth et al. 2013)<sup>40</sup>, V35 (Peterson et al. 2009)<sup>52</sup>, V4 (Apprill et al. 2014)<sup>53</sup>, V45 (Parada et al. 2015)<sup>54</sup>, and V58 (Klindworth et al. 2013)<sup>40</sup>.

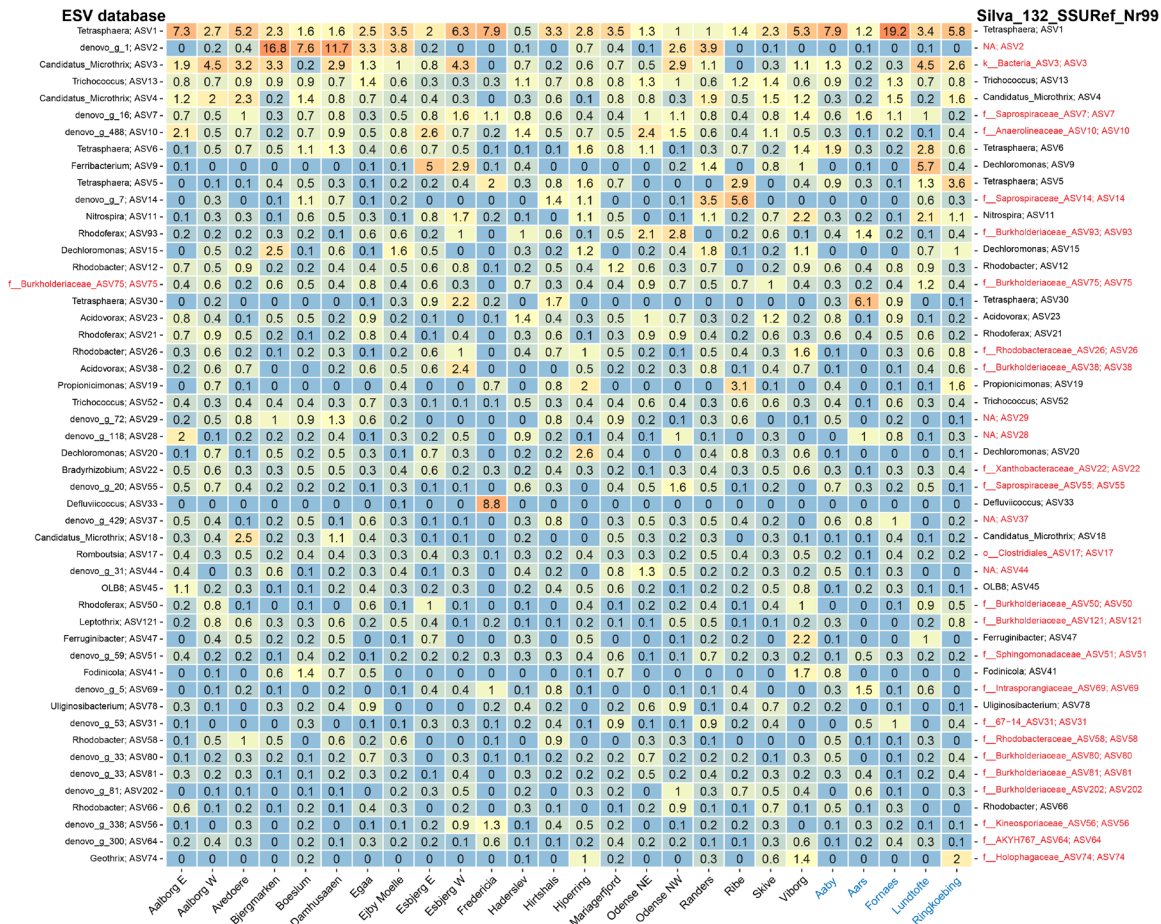

731  
732  
733  
734  
735  
736  
737

**Figure 4. Relative abundance of the top 50 ASVs in the activated sludge samples**  
ASVs obtained from individual activated sludge samples used to create ESV database (black labels) and from other plants (blue labels) were classified based on the ESV database as well as the SILVA\_132\_SSURef\_Nr99 database. ASVs not classified at the genus level have been highlighted in red.



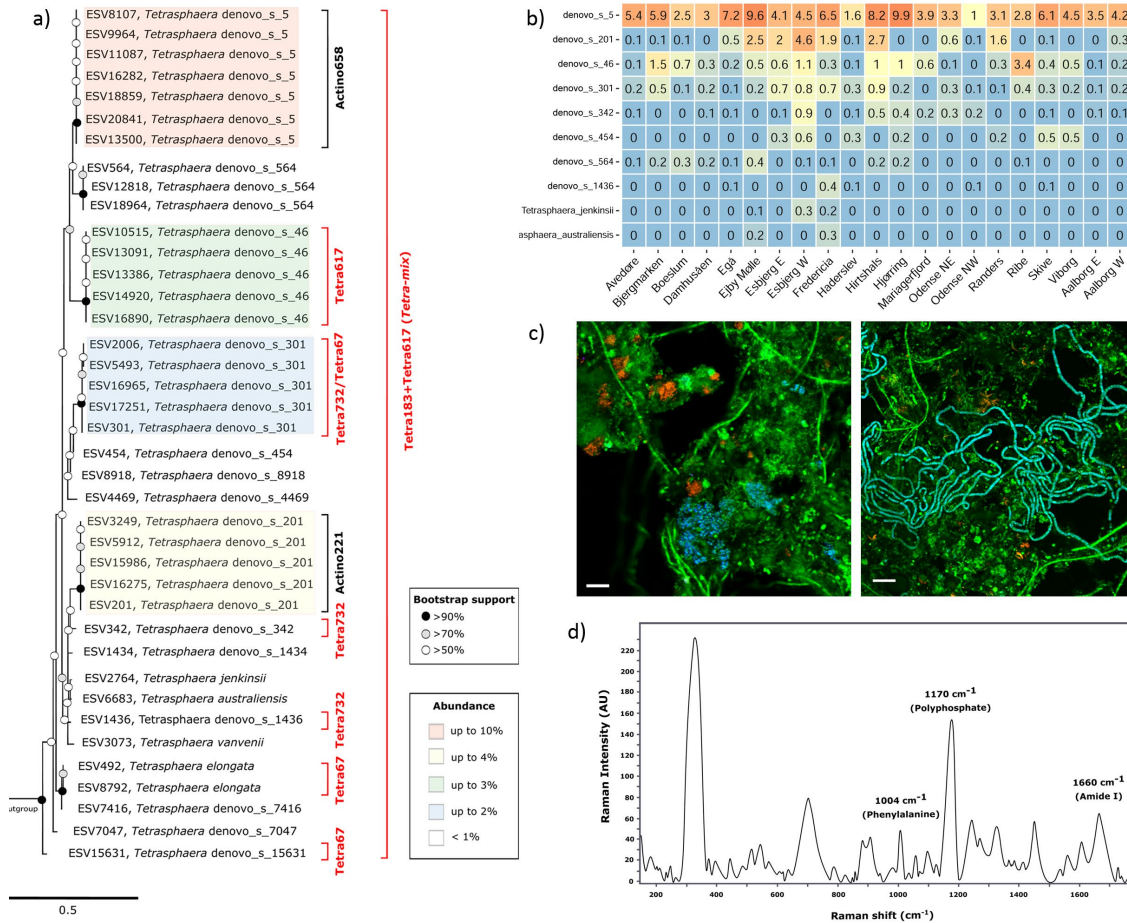

738

739

740

741

742

743

744

745

746

747

748

749

750

751

752

753

754

755

756

**Figure 5. Detailed investigation into the genus *Tetrasphaera*.** a) Maximum-likelihood (PhyML) 16S rRNA gene phylogenetic tree of activated sludge *Tetrasphaera* species and coverage of the existing (black) and new FISH probes (red). A 20% conservational filter was applied to the alignment used for the tree to remove hypervariable regions, giving 1422 positions. Coverage of probes relevant to the current study is shown in black brackets. Bootstrap values from 1000 re-samplings are indicated for branches with >50% (white dot), 50%–70% (gray), and >90% (black) support. Species of the genus *Dechloromonas* were used as the outgroup. The scale bar represents substitutions per nucleotide base. b) Abundance of top 10 *Tetrasphaera* species in full-scale activated sludge WWTPs sampled 2–4 times per year from 2006 to 2018. c) Composite FISH micrographs of chosen *Tetrasphaera* species from full-scale activated sludge WWTP. Left panel: rods of denovo\_s\_46 (orange) and tetrads of denovo\_s\_201 (blue) targeted by the probe Tetra617 and Actino221<sup>50</sup>, respectively. Right panel: filaments of denovo\_s\_342 (cyan) and rods of denovo\_s\_5 (orange) targeted by the probe Actino658<sup>50</sup> and Tetra732, respectively. In both images, all other bacteria (green) are targeted by the probe EUBmix. Scale bars represent 10 μm. d) Raman spectrum of *Tetrasphaera* denovo\_s\_46 cells targeted by the Tetra617 probe. The presence of the signature peak for polyphosphate (1170 cm<sup>-1</sup>) indicates the

757 potential accumulation of polyphosphate as intracellular storage compound. Peaks for  
758 phenylalanine ( $1004\text{ cm}^{-1}$ ) and amide I linkages of proteins ( $1450\text{ cm}^{-1}$ ), highlighted in the  
759 spectrum, are specific markers for biological material.  
760  
761

762 **Tables:**

763

764 **Table 1: Numbers and percentage of ESVs estimated to belong to novel taxa.** ESVs  
 765 were mapped to SILVA\_132\_SSURef\_Nr99 using usearch\_global -id 0.5 -maxrejects 0 -  
 766 strand plus to find the identity with the closest relative in the database. Novelty was  
 767 determined, based on the identity for each ESV, based on the taxonomic thresholds  
 768 proposed by Yarza et al. (2014) <sup>9</sup>.

769

| Environment      | Library   | Kingdom  | nSeqs | Species<br>[<98.7%] | Genus<br>[<94.5%] | Family<br>[<86.5%] | Order<br>[<82.0%] | Class<br>[<78.5%] | Phylum<br>[<75.0%] |
|------------------|-----------|----------|-------|---------------------|-------------------|--------------------|-------------------|-------------------|--------------------|
| Activated sludge | RNA-based | Archaea  | 6     | 0                   | 0                 | 0                  | 0                 | 0                 | 0                  |
| Activated sludge | RNA-based | Bacteria | 499   | 43 / 8.61%          | 2 / 0.4%          | 0                  | 0                 | 0                 | 0                  |
| Activated sludge | DNA-based | Bacteria | 11266 | 2053 / 18.2%        | 398 / 3.53%       | 38 / 0.34%         | 8 / 0.071%        | 4 / 0.036%        | 3 / 0.027%         |
| Anaerobic dig.   | RNA-based | Archaea  | 274   | 10 / 3.65%          | 0                 | 0                  | 0                 | 0                 | 0                  |
| Anaerobic dig.   | RNA-based | Bacteria | 262   | 40 / 15.3%          | 9 / 3.44%         | 0                  | 0                 | 0                 | 0                  |
| Anaerobic dig.   | DNA-based | Bacteria | 8638  | 2100 / 24.3%        | 399 / 4.62%       | 31 / 0.36%         | 9 / 0.10%         | 5 / 0.058%        | 3 / 0.035%         |

770

771

772 **Table 2: Numbers and percentage of taxa which were assigned *de novo* names.**

| Environment        | Library type | Kingdom  | Species      | Genus       | Family      | Order      | Class      | Phylum    |
|--------------------|--------------|----------|--------------|-------------|-------------|------------|------------|-----------|
| Activated sludge   | RNA-based    | Archaea  | 2 / 100%     | 0           | 0           | 0          | 0          | 0         |
| Activated sludge   | RNA-based    | Bacteria | 196 / 92.5%  | 47 / 40.1%  | 14 / 20.0%  | 4 / 8.00%  | 0          | 0         |
| Activated sludge   | DNA-based    | Bacteria | 2745 / 94.8% | 899 / 71.0% | 181 / 44.1% | 49 / 24.9% | 8 / 10.0%  | 1 / 2.86% |
| Anaerobic digester | RNA-based    | Archaea  | 12 / 70.6%   | 0           | 0           | 0          | 0          | 0         |
| Anaerobic digester | RNA-based    | Bacteria | 117 / 91.4%  | 50 / 51.0%  | 21 / 30.4%  | 6 / 12.0%  | 3 / 9.68%  | 0         |
| Anaerobic digester | DNA-based    | Bacteria | 1793 / 94.5% | 605 / 66.4% | 131 / 43.0% | 39 / 23.1% | 11 / 14.3% | 0         |

773
